# Supplementary material for: Tissue vs. Fecal-Derived Bacterial Dysbiosis in Precancerous Colorectal Lesions: A Systematic Review
Source: MDPI journal article supplement (doi:10.3390/cancers15051602), 2023-03-04
Supplement: s1 [file s1]

**Supplementary Table 3.** Summary of human studies investigating precancerous colorectal lesions and healthy control stool and tissue specimens addressing microbial compositional shifts.

| Author (publish date)                                                                                                                          | Quality assessment (NOS)<br>≥5/9 | Study group size (n)                                                                                                | Control group size (n)                                                                                 | Type of matrix (F/T)                                                                                         | Detection method                | Prevalence/ abundance of bacteria (Phylum; class; order; family; genus, species) and/or $\alpha$ - $\beta$ -diversity in precancerous CR lesions                                                                                              | Clinical evidence (association with A, Cis and/or CRC)                                                                                                             |
|------------------------------------------------------------------------------------------------------------------------------------------------|----------------------------------|---------------------------------------------------------------------------------------------------------------------|--------------------------------------------------------------------------------------------------------|--------------------------------------------------------------------------------------------------------------|---------------------------------|-----------------------------------------------------------------------------------------------------------------------------------------------------------------------------------------------------------------------------------------------|--------------------------------------------------------------------------------------------------------------------------------------------------------------------|
| Human studies examining <b>FECAL</b> and/vs. <b>TISSUE</b> – derived gut bacterial composition in precancerous colorectal lesions (and/or CRC) |                                  |                                                                                                                     |                                                                                                        |                                                                                                              |                                 |                                                                                                                                                                                                                                               |                                                                                                                                                                    |
| Zeller et al. (2014) [30]                                                                                                                      | 5/9                              | French (Fr) cohort: TA: 42; CRC: 53; German cohort (G): CRC: 38; German cohort (G): CRC 48 (at the time of surgery) | Fr: HC: 61; A <1 cm: 27; German, Danish and Spanish cohort (H): HC: 297 (not confirmed by colonoscopy) | Fr and G: F (prior to bowel prep or 10 days after colonoscopy); H: F; G: T (from tumor and matched normal T) | 16S, metagenomic sequencing     | <i>Bacteroidetes</i> : <i>Firmicutes</i> ratio and <i>Ruminococcus</i> genus differed significantly in A vs. CRC and HC.                                                                                                                      | Microbiota changes during early stages of neoplastic growth suggesting that identification of reliable microbial markers for AA as CRC precursors may be possible. |
| Mira-Pascual et al. (2015) [23]                                                                                                                | 7/9                              | TA: 11; CRC: 7                                                                                                      | HC: 10 (F and normal rectal T)                                                                         | F (prior to bowel prep); T (from tumor)                                                                      | 16S: V1–V3 PCoA; <i>Fn</i> qPCR | F: ↑ <i>Blautia</i> , <i>Fusobacterium</i> . T: ↑ <i>Bifidobacterium</i> , <i>Fusobacterium</i> ( <i>Fn</i> and others), <i>Enterobacteriaceae</i> , <i>Akkermansia</i> , <i>Blautia</i> , <i>Prevotella</i> , <i>Bacteroides</i> in A < CRC. | Microbial changes according to disease progression step and tumor severity. T samples represented the underlying dysbiosis, whereas F                              |

NOS: Newcastle-Ottawa scale; NA: not applicable; A: adenoma; AA: advanced adenoma (> 1 cm in diameter and/or high grade dysplasia (+/- villous, or tubulovillous morphology); NAA: non-advanced adenoma; TA or CA: conventional or traditional adenoma (≤ 1 cm diameter, without dysplasia (tubular, tubulovillous or villous)); HP: hyperplastic polyp; SSA: sessile serrated adenoma; TSA: traditional serrated adenoma; Cis: Ca in situ/intramucosal carcinoma/carcinoma in adenoma; CR: colorectal; CRA: colorectal adenoma; CRC: colorectal cancer; LST: laterally spreading tumor; HC: healthy controls; F: fecal samples; T: tissue (mucosal) samples; 16S: 16S rRNA gene sequencing; WGS: whole-genome shotgun sequencing; T-RFLP: terminal restriction fragment length polymorphism; NGS: next-generation sequencing; MGWAS: metagenome-wide association study; FISH: fluorescence in situ hybridization; LC-TOFMS: liquid chromatography time-of-flight mass spectrometry; GC-TOFMS: gas chromatography time-of-flight mass spectrometry; HPLC: high-performance liquid chromatography analysis; UPLC-MS: ultra performance liquid chromatography-mass spectrometry; ITS: Internal Transcribed Spacer (ITS) ribosomal RNA sequencing; FOBT: fecal occult blood test; CI: confidence interval; OR: odds ratio; AUC: area under the curve; OUTs: operational taxonomic units; *ETBF*: enterotoxigenic *Bacteroides fragilis*; SCFAs: short-chain fatty acids; FFFFT: fresh-frozen formalin fixed tissue; FFPE: formalin-fixed paraffin-embedded; prep: preparation; *Fn*: *Fusobacterium nucleatum*.

|                           |     |                                                      |                         |                                                                                                        |                                             |                                                                                                                                                                                                                                                                                                                                                                                                                                            |                                                                                                                                                                                                                                                                                                                                                              |
|---------------------------|-----|------------------------------------------------------|-------------------------|--------------------------------------------------------------------------------------------------------|---------------------------------------------|--------------------------------------------------------------------------------------------------------------------------------------------------------------------------------------------------------------------------------------------------------------------------------------------------------------------------------------------------------------------------------------------------------------------------------------------|--------------------------------------------------------------------------------------------------------------------------------------------------------------------------------------------------------------------------------------------------------------------------------------------------------------------------------------------------------------|
|                           |     |                                                      |                         |                                                                                                        |                                             | ↑ <i>Enterococcaceae</i> family in A > CRC > HC.                                                                                                                                                                                                                                                                                                                                                                                           | samples seem not to be appropriate to detect shifts in microbial composition. <i>Fusobacterium</i> , <i>Bacteroides</i> , and <i>Methanobacteriales</i> may provide a potential marker for early detection of CRC.                                                                                                                                           |
| Yu et al. (2015) [25]     | 5/9 | F: A: 47; CRC: 42; T: A: 30; CRC: 31                 | F: HC: 52; T: HC: 37    | F (prior to bowel prep); T (left colonic biopsies –during CR surgery)                                  | 16S; 454 FLX pyrosequencing, <i>Fn</i> qPCR | F: ↑ <i>Fusobacterium</i> , <i>Escherichia-Shigella</i> , <i>Coprococcus</i> , <i>Streptococcus</i> , <i>Enterococcus</i> spp.;<br>↓ <i>Actinomyces</i> , <i>Bifidobacterium</i> , <i>Lactobacillus</i> , butyrate-producing bacteria ( <i>Clostridium</i> , <i>Roseburia</i> , <i>Eubacterium</i> , <i>Blautia</i> , and <i>Dorea</i> spp.) during the A-carcinoma sequence.<br>F and T: ↑ <i>Fusobacterial</i> phylum: from HC < A < CRC | Microbial structures were altered in the lumen and the mucosa during the progression of the A-carcinoma sequence.<br><i>Fusobacterium</i> expression in the T was consistent with that in F; therefore, F samples may replace tissue specimens as a simpler and more practical diagnostic method for the early detection of <i>Fusobacterium</i> enrichment. |
| Flemer et al. (2017) [24] | 6/9 | A: 21 (T samples); CRC: 59 (32 both F and T samples) | HC: 56 (32 age-matched) | F (prior to bowel prep) and T (CRC group: ‘ON’ and ‘OFF’ the tumor, proximal and distal after surgery; | 16S; qRT-PCR                                | F and T: microbiota differed in CRC vs. HC (p<0.05) and A vs. HC (p > 0.05).<br>T: A had similar trends to CRC changes (p > 0.05).                                                                                                                                                                                                                                                                                                         | Alterations not restricted to the cancerous tissue. Differences between distal and proximal CRC. The microbiota compositional differences in patients with CRC are not secondary to the cancer per se.                                                                                                                                                       |

NOS: Newcastle-Ottawa scale; NA: not applicable; A: adenoma; AA: advanced adenoma (> 1 cm in diameter and/or high grade dysplasia (+/- villous, or tubulovillous morphology); NAA: non-advanced adenoma; TA or CA: conventional or traditional adenoma (≤ 1 cm diameter, without dysplasia (tubular, tubulovillous or villous)); HP: hyperplastic polyp; SSA: sessile serrated adenoma; TSA: traditional serrated adenoma; Cis: Ca in situ/intramucosal carcinoma/carcinoma in adenoma; CR: colorectal; CRA: colorectal adenoma; CRC: colorectal cancer; LST: laterally spreading tumor; HC: healthy controls; F: fecal samples; T: tissue (mucosal) samples; 16S: 16s rRNA gene sequencing; WGS: whole-genome shotgun sequencing; T-RFLP: terminal restriction fragment length polymorphism; NGS: next-generation sequencing; MGWAS: metagenome-wide association study; FISH: fluorescence in situ hybridization; LC-TOFMS: liquid chromatography time-of-flight mass spectrometry; GC-TOFMS: gas chromatography time-of-flight mass spectrometry; HPLC: high-performance liquid chromatography analysis; UPLC-MS: ultra performance liquid chromatography-mass spectrometry; ITS: Internal Transcribed Spacer (ITS) ribosomal RNA sequencing; FOBT: fecal occult blood test; CI: confidence interval; OR: odds ratio; AUC: area under the curve; OUTs: operational taxonomic units; *ETBF*: enterotoxigenic *Bacteroides fragilis*; SCFAs: short-chain fatty acids; FFFFT: fresh-frozen formalin fixed tissue; FFPE: formalin-fixed paraffin-embedded; prep: preparation; *Fn*: *Fusobacterium nucleatum*.

|                           |     |                                                               |                         |                                                                              |           |                                                                                                                                                                                                                                                                                                                                                                                                                                                                                       |                                                                                                                                                                                                                             |
|---------------------------|-----|---------------------------------------------------------------|-------------------------|------------------------------------------------------------------------------|-----------|---------------------------------------------------------------------------------------------------------------------------------------------------------------------------------------------------------------------------------------------------------------------------------------------------------------------------------------------------------------------------------------------------------------------------------------------------------------------------------------|-----------------------------------------------------------------------------------------------------------------------------------------------------------------------------------------------------------------------------|
|                           |     |                                                               |                         | A: undiseased proximal and distal colon mucosa)<br>No F samples from A group |           | No difference was found in microbiota composition of tumor and paired non-tumor tissues.                                                                                                                                                                                                                                                                                                                                                                                              | F microbiota only partially reflected mucosal microbiota.<br>T microbiota in A similar to CRC (not statistically significant)                                                                                               |
| Shen et al. (2021) [26]   | 7/9 | T group: A: 8; LST: 11.<br>F group: A: 208; LST: 109; CRC: 45 | T: HC: 5;<br>F: HC: 113 | F (prior to bowel prep); T (from tumor)                                      | 16S; qPCR | T: ↑ genus <i>Lactobacillus</i> - <i>Streptococcus</i> and the spp. <i>ETBF</i> - <i>Peptostreptococcus stomatis</i> ( <i>P. stomatis</i> )- <i>Parvimonas micra</i> ( <i>P. micra</i> ); <i>Lactobacillus johnsonii</i> ( <i>L. johnsonii</i> ) in LST.<br>F: <i>ETBF</i> , <i>P. stomatis</i> , and <i>P. micra</i> steadily ↑ in LST and CRC.                                                                                                                                      | F microbial biomarkers <i>ETBF</i> - <i>P. stomatis</i> - <i>P. micra</i> were defined as early noninvasive biomarkers of LST.<br><i>P. stomatis</i> behaved high accuracy on predicting A recurrence after LST resections. |
| Watson et al. (2021) [27] | 5/9 | A: 48                                                         | Non-A patients: 56      | F; T (from polyp, normal right, left colon and rectum); oral swab (O)        | 16S: V4   | T and F: ↑ <i>Firmicutes</i> , <i>Bacteroidetes</i> ;<br>O: ↑ <i>Firmicutes</i> , <i>Proteobacteria</i> .<br>T: ↑ microbial diversity > F and O<br>T: ↑ families <i>Lachnospiraceae</i> , <i>Ruminococcaceae</i> genera <i>Bacteroides</i> and <i>Marvinbryantia</i> , <i>Blautia obeum</i> , <i>Streptococcus</i> , genera <i>Veillonella</i> , <i>Odoribacter</i> , <i>Haemophilus</i> , <i>Coprobacter</i> , <i>Eggerthella</i> , <i>Granulicatella</i> , <i>Actinomyces</i> in A. | F- and T-associated microbiomes are distinct; T microbiome is highly predictive of A status.                                                                                                                                |

NOS: Newcastle-Ottawa scale; NA: not applicable; A: adenoma; AA: advanced adenoma (> 1 cm in diameter and/or high grade dysplasia (+/- villous, or tubulovillous morphology); NAA: non-advanced adenoma; TA or CA: conventional or traditional adenoma (≤ 1 cm diameter, without dysplasia (tubular, tubulovillous or villous)); HP: hyperplastic polyp; SSA: sessile serrated adenoma; TSA: traditional serrated adenoma; Cis: Ca in situ/intramucosal carcinoma/carcinoma in adenoma; CR: colorectal; CRA: colorectal adenoma; CRC: colorectal cancer; LST: laterally spreading tumor; HC: healthy controls; F: fecal samples; T: tissue (mucosal) samples; 16S: 16S rRNA gene sequencing; WGS: whole-genome shotgun sequencing; T-RFLP: terminal restriction fragment length polymorphism; NGS: next-generation sequencing; MGWAS: metagenome-wide association study; FISH: fluorescence in situ hybridization; LC-TOFMS: liquid chromatography time-of-flight mass spectrometry; GC-TOFMS: gas chromatography time-of-flight mass spectrometry; HPLC: high-performance liquid chromatography analysis; UPLC-MS: ultra performance liquid chromatography-mass spectrometry; ITS: Internal Transcribed Spacer (ITS) ribosomal RNA sequencing; FOBT: fecal occult blood test; CI: confidence interval; OR: odds ratio; AUC: area under the curve; OUTs: operational taxonomic units; *ETBF*: enterotoxigenic *Bacteroides fragilis*; SCFAs: short-chain fatty acids; FFFFT: fresh-frozen formalin fixed tissue; FFPE: formalin-fixed paraffin-embedded; prep: preparation; *Fn*: *Fusobacterium nucleatum*.

|                                    |     |                                  |        |                                                                                                                                                                        |                                                                                       |                                                                                                                                                                                                                                                                                                                                                                                                                                                                                                                                                         |                                                                                                                                                                                                                          |
|------------------------------------|-----|----------------------------------|--------|------------------------------------------------------------------------------------------------------------------------------------------------------------------------|---------------------------------------------------------------------------------------|---------------------------------------------------------------------------------------------------------------------------------------------------------------------------------------------------------------------------------------------------------------------------------------------------------------------------------------------------------------------------------------------------------------------------------------------------------------------------------------------------------------------------------------------------------|--------------------------------------------------------------------------------------------------------------------------------------------------------------------------------------------------------------------------|
|                                    |     |                                  |        |                                                                                                                                                                        | F: ↑ family <i>Lachnospiraceae</i> , taxa <i>Erysipelatoclostridium ramosum</i> in A. |                                                                                                                                                                                                                                                                                                                                                                                                                                                                                                                                                         |                                                                                                                                                                                                                          |
|                                    |     |                                  |        |                                                                                                                                                                        | O: ↑ <i>Rothia mucilaginosa</i> in A.                                                 |                                                                                                                                                                                                                                                                                                                                                                                                                                                                                                                                                         |                                                                                                                                                                                                                          |
| Avelar-Barragan et al. (2022) [31] | 5/9 | TA: 45; SP (HP, TSA, or SSP): 33 | HC: 50 | F (stool samples 4-6 weeks after colonoscopy); T (mucosal brush samples from polyp and healthy opposite wall; mucosal aspirates from near the polyp; lavage aspirates) | 16S, ITS sequencing; WGS                                                              | ↑ <i>Gemellaceae</i> family and 2 <i>Streptococcus spp.</i> in mucosal aspirates vs. mucosal brushes.                                                                                                                                                                                                                                                                                                                                                                                                                                                   | Microbiomes of mucosal brushes and mucosal aspirates did not significantly differ in diversity or composition. Microbiomes of F samples were significantly ↑ diverse and compositionally distinct vs. mucosal aspirates. |
|                                    |     |                                  |        |                                                                                                                                                                        |                                                                                       | ↑ diversity in F samples vs. mucosal aspirates, marginally ↑ diversity > in lavage aspirates. F: 63% <i>Firmicutes</i> , 27% <i>Bacteroides</i> , 3.5% <i>Actinobacteria</i> , 4.5% <i>Proteobacteria</i> . Mucosal aspirates and lavage aspirates: 73 and 75% <i>Firmicutes</i> , 15 and 11% <i>Bacteroides</i> , 4.7 and 5.2% <i>Actinobacteria</i> , and 4.0 and 6.6% <i>Proteobacteria</i> , respectively. TA mucosal aspirates: ↑ <i>Lachnospiraceae</i> , such as <i>Ruminococcus gnavus</i> , <i>C. scindens</i> , <i>Bacteroides fragilis</i> ; |                                                                                                                                                                                                                          |

NOS: Newcastle-Ottawa scale; NA: not applicable; A: adenoma; AA: advanced adenoma (> 1 cm in diameter and/or high grade dysplasia (+/- villous, or tubulovillous morphology); NAA: non-advanced adenoma; TA or CA: conventional or traditional adenoma (≤ 1 cm diameter, without dysplasia (tubular, tubulovillous or villous)); HP: hyperplastic polyp; SSA: sessile serrated adenoma; TSA: traditional serrated adenoma; Cis: Ca in situ/intramucosal carcinoma/carcinoma in adenoma; CR: colorectal; CRA: colorectal adenoma; CRC: colorectal cancer; LST: laterally spreading tumor; HC: healthy controls; F: fecal samples; T: tissue (mucosal) samples; 16S: 16S rRNA gene sequencing; WGS: whole-genome shotgun sequencing; T-RFLP: terminal restriction fragment length polymorphism; NGS: next-generation sequencing; MGWAS: metagenome-wide association study; FISH: fluorescence in situ hybridization; LC-TOFMS: liquid chromatography time-of-flight mass spectrometry; GC-TOFMS: gas chromatography time-of-flight mass spectrometry; HPLC: high-performance liquid chromatography analysis; UPLC-MS: ultra performance liquid chromatography-mass spectrometry; ITS: Internal Transcribed Spacer (ITS) ribosomal RNA sequencing; FOBT: fecal occult blood test; CI: confidence interval; OR: odds ratio; AUC: area under the curve; OUTs: operational taxonomic units; *ETBF*: enterotoxigenic *Bacteroides fragilis*; SCFAs: short-chain fatty acids; FFFFT: fresh-frozen formalin fixed tissue; FFPE: formalin-fixed paraffin-embedded; prep: preparation; *Fn*: *Fusobacterium nucleatum*.

SP mucosal aspirates: ↓ *E. lenta*, *A. hadrus*  
 HC vs TA mucosal aspirates:  
*Ruthenibacterium* sp., *Ruminococcus gnavus*, *Ruminococcus* sp., *Dorea* sp., and *Blautia* sp.  
 HC vs SP: *Anaerostipes hadrus*, *Dorea longiatena*, *E. lenta*, *Clostridium ramosum*, and *Alistipes finegoldii*;  
 SP vs TA: *Gemmiger formicilis*, *E. lenta*, *Bifidobacterium* sp., *Ruthenibacterium* sp., UBA7182 HGM12585.

| Human studies examining FECAL – derived gut bacterial composition in precancerous colorectal lesions (and/or CRC) |     |      |       |                                |                                                      |                                                                                                                                                             |                                                                                                                                                                                            |
|-------------------------------------------------------------------------------------------------------------------|-----|------|-------|--------------------------------|------------------------------------------------------|-------------------------------------------------------------------------------------------------------------------------------------------------------------|--------------------------------------------------------------------------------------------------------------------------------------------------------------------------------------------|
| Brim et al. (2013) [18]                                                                                           | 5/9 | A: 6 | HC: 6 | F (2 months after colonoscopy) | 16S, Human intestinal Tract Chip, 454 pyrosequencing | Subgenus level: ↑ <i>Bacteroides</i> in HC vs A; ↑ <i>Firmicutes</i> in A vs HC. <i>Bacteroidetes</i> and <i>Firmicutes</i> – most ↑ groups in all samples. | Bacteria and associated functions within the <i>Bacteroides</i> group need to be further analyzed for potential actors in the early colon oncogenic transformation in a large sample size. |

NOS: Newcastle-Ottawa scale; NA: not applicable; A: adenoma; AA: advanced adenoma (> 1 cm in diameter and/or high grade dysplasia (+/- villous, or tubulovillous morphology); NAA: non-advanced adenoma; TA or CA: conventional or traditional adenoma (≤ 1 cm diameter, without dysplasia (tubular, tubulovillous or villous)); HP: hyperplastic polyp; SSA: sessile serrated adenoma; TSA: traditional serrated adenoma; Cis: Ca in situ/intramucosal carcinoma/carcinoma in adenoma; CR: colorectal; CRA: colorectal adenoma; CRC: colorectal cancer; LST: laterally spreading tumor; HC: healthy controls; F: fecal samples; T: tissue (mucosal) samples; 16S: 16s rRNA gene sequencing; WGS: whole-genome shotgun sequencing; T-RFLP: terminal restriction fragment length polymorphism; NGS: next-generation sequencing; MGWAS: metagenome-wide association study; FISH: fluorescence in situ hybridization; LC-TOFMS: liquid chromatography time-of-flight mass spectrometry; GC-TOFMS: gas chromatography time-of-flight mass spectrometry; HPLC: high-performance liquid chromatography analysis; UPLC-MS: ultra performance liquid chromatography-mass spectrometry; ITS: Internal Transcribed Spacer (ITS) ribosomal RNA sequencing; FOBT: fecal occult blood test; CI: confidence interval; OR: odds ratio; AUC: area under the curve; OUTs: operational taxonomic units; *ETBF*: enterotoxigenic *Bacteroides fragilis*; SCFAs: short-chain fatty acids; FFFFT: fresh-frozen formalin fixed tissue; FFPE: formalin-fixed paraffin-embedded; prep: preparation; *Fn*: *Fusobacterium nucleatum*.

|                            |     |                                                         |        |                                       |       |                                                                                                                                                                                                                                                                                                                                                                                                                                                                                                                                                                              |                                                                                                                                      |
|----------------------------|-----|---------------------------------------------------------|--------|---------------------------------------|-------|------------------------------------------------------------------------------------------------------------------------------------------------------------------------------------------------------------------------------------------------------------------------------------------------------------------------------------------------------------------------------------------------------------------------------------------------------------------------------------------------------------------------------------------------------------------------------|--------------------------------------------------------------------------------------------------------------------------------------|
| Chen et al. (2013) [49]    | 5/9 | AA: 47 (sex- and age matched)                           | HC: 47 | F                                     | 16S   | ↓ Butyrate/butyrate-producing bacteria;<br>↓ <i>Clostridium</i> , <i>Roseburia</i> , <i>Eubacteria</i> ;<br>↑ <i>Enterococcus</i> , <i>Bacteroidetes</i> , <i>Streptococcus spp.</i> in AA.                                                                                                                                                                                                                                                                                                                                                                                  | A high-fiber dietary pattern, subsequent consistent production of SCFAs and healthy gut microbiota are associated with ↓ risk of AA. |
| Feng et al. (2015) [50]    | 7/9 | AA: 44, CRC: 46 (45-86 yr, both genders and white race) | HC: 57 | F (prior to bowel prep)               | MGWAS | <i>Bacteroides</i> , <i>Prevotella</i> , <i>Parabacteroides spp.</i> , <i>Alistipes putredinis</i> , <i>Bilophila wadsworthia</i> , <i>Lachnospiraceae bacterium</i> , <i>Fusobacterium</i> , <i>E. coli</i> .<br>↑ <i>B. dorei</i> , <i>B. massiliensis</i> from HC→AA, and significant ↑↑↑ of <i>B. massiliensis</i> , <i>B. ovatus</i> , <i>B. vulgatus</i> and <i>E. coli</i> from AA→to CRC.<br><i>B. dorei</i> , <i>B. vulgatus</i> , <i>E. coli</i> also correlated with levels of CRP.<br>No difference in the abundance of <i>Akkermansia</i> among AA, HC and CRC. | Development of AA and CRC.                                                                                                           |
| Goedert et al. (2015) [37] | 5/9 | A: 20; CRC: 2; other: 15                                | HC: 24 | F (during FIT+ screening colonoscopy) | 16S   | Phylum-level F community composition differed significantly between A and HC (P = 0.02).                                                                                                                                                                                                                                                                                                                                                                                                                                                                                     | If confirmed in larger, more diverse populations, F microbiota analysis might be employed to improve screening for CRA.              |

NOS: Newcastle-Ottawa scale; NA: not applicable; A: adenoma; AA: advanced adenoma (> 1 cm in diameter and/or high grade dysplasia (+/- villous, or tubulovillous morphology); NAA: non-advanced adenoma; TA or CA: conventional or traditional adenoma (≤ 1 cm diameter, without dysplasia (tubular, tubulovillous or villous)); HP: hyperplastic polyp; SSA: sessile serrated adenoma; TSA: traditional serrated adenoma; Cis: Ca in situ/intramucosal carcinoma/carcinoma in adenoma; CR: colorectal; CRA: colorectal adenoma; CRC: colorectal cancer; LST: laterally spreading tumor; HC: healthy controls; F: fecal samples; T: tissue (mucosal) samples; 16S: 16S rRNA gene sequencing; WGS: whole-genome shotgun sequencing; T-RFLP: terminal restriction fragment length polymorphism; NGS: next-generation sequencing; MGWAS: metagenome-wide association study; FISH: fluorescence in situ hybridization; LC-TOFMS: liquid chromatography time-of-flight mass spectrometry; GC-TOFMS: gas chromatography time-of-flight mass spectrometry; HPLC: high-performance liquid chromatography analysis; UPLC-MS: ultra performance liquid chromatography-mass spectrometry; ITS: Internal Transcribed Spacer (ITS) ribosomal RNA sequencing; FOBT: fecal occult blood test; CI: confidence interval; OR: odds ratio; AUC: area under the curve; OUTs: operational taxonomic units; *ETBF*: enterotoxigenic *Bacteroides fragilis*; SCFAs: short-chain fatty acids; FFFFT: fresh-frozen formalin fixed tissue; FFPE: formalin-fixed paraffin-embedded; prep: preparation; *Fn*: *Fusobacterium nucleatum*.

|                          |     |                                          |        |                         |             |  |                                                                                                                                                                                                                                                                                                                                                                                                                                                                  |
|--------------------------|-----|------------------------------------------|--------|-------------------------|-------------|--|------------------------------------------------------------------------------------------------------------------------------------------------------------------------------------------------------------------------------------------------------------------------------------------------------------------------------------------------------------------------------------------------------------------------------------------------------------------|
|                          |     |                                          |        |                         |             |  | Rank phylum-level abundance distinguished A from HC.<br>A prevalence was 59% in phylum-level cluster B versus 20% in cluster A.<br>↑↑↑ Proteobacteria ( <i>Pseudomonas</i> , <i>Escherichia</i> , <i>Shigella</i> , <i>Salmonella</i> , <i>Serratia</i> , <i>Klebsiella</i> , and <i>Helicobacter</i> ),<br>↑ TM7; ↓ <i>Fusobacteria</i> .                                                                                                                       |
|                          |     |                                          |        |                         |             |  | T-RFLP:<br>no significant differences in bacterial population between HC, A and CRC.<br>NGS:<br>↑ <i>F. varium</i> rDNA copies in Cis vs HC;<br>Genera: <i>Actinomyces</i> , <i>Atopobium</i> , <i>Fusobacterium</i> , and <i>Haemophilus</i> , <i>Actinomyces odontolyticus</i> , <i>Bacteroides fragilis</i> , <i>Clostridium nexile</i> , <i>Fusobacterium varium</i> , <i>Haemophilus parainfluenzae</i> , <i>Prevotella stercora</i> , <i>Streptococcus</i> |
| Kasai et al. (2016) [55] | 5/9 | A: 50, CRC: 9 (3 - invasive and 6 - Cis) | HC: 49 | F (prior to bowel prep) | T-RFLP; NGS |  | Gut microbiota is related to CRC prevention and development.                                                                                                                                                                                                                                                                                                                                                                                                     |

NOS: Newcastle-Ottawa scale; NA: not applicable; A: adenoma; AA: advanced adenoma (> 1 cm in diameter and/or high grade dysplasia (+/- villous, or tubulovillous morphology); NAA: non-advanced adenoma; TA or CA: conventional or traditional adenoma (≤ 1 cm diameter, without dysplasia (tubular, tubulovillous or villous)); HP: hyperplastic polyp; SSA: sessile serrated adenoma; TSA: traditional serrated adenoma; Cis: Ca in situ/intramucosal carcinoma/carcinoma in adenoma; CR: colorectal; CRA: colorectal adenoma; CRC: colorectal cancer; LST: laterally spreading tumor; HC: healthy controls; F: fecal samples; T: tissue (mucosal) samples; 16S: 16S rRNA gene sequencing; WGS: whole-genome shotgun sequencing; T-RFLP: terminal restriction fragment length polymorphism; NGS: next-generation sequencing; MGWAS: metagenome-wide association study; FISH: fluorescence in situ hybridization; LC-TOFMS: liquid chromatography time-of-flight mass spectrometry; GC-TOFMS: gas chromatography time-of-flight mass spectrometry; HPLC: high-performance liquid chromatography analysis; UPLC-MS: ultra performance liquid chromatography-mass spectrometry; ITS: Internal Transcribed Spacer (ITS) ribosomal RNA sequencing; FOBT: fecal occult blood test; CI: confidence interval; OR: odds ratio; AUC: area under the curve; OUTs: operational taxonomic units; ETBF: enterotoxigenic *Bacteroides fragilis*; SCFAs: short-chain fatty acids; FFFFT: fresh-frozen formalin fixed tissue; FFPE: formalin-fixed paraffin-embedded; prep: preparation; Fn: *Fusobacterium nucleatum*.

|                                 |     |                                                                                               |         |                                                                |           |                                                                                                                                                                                                                                                                                                                                                                                     |                                                                                                                                                                                                                                       |
|---------------------------------|-----|-----------------------------------------------------------------------------------------------|---------|----------------------------------------------------------------|-----------|-------------------------------------------------------------------------------------------------------------------------------------------------------------------------------------------------------------------------------------------------------------------------------------------------------------------------------------------------------------------------------------|---------------------------------------------------------------------------------------------------------------------------------------------------------------------------------------------------------------------------------------|
|                                 |     |                                                                                               |         |                                                                |           | <i>gordonii</i> , <i>Veillonella dispar</i><br>significantly associated with Cis.                                                                                                                                                                                                                                                                                                   |                                                                                                                                                                                                                                       |
|                                 |     |                                                                                               |         |                                                                |           | ↓ <i>Clostridia</i> (families<br><i>Ruminococcaceae</i> , <i>Clostridiaceae</i> , and<br><i>Lachnospiraceae</i> );<br>↑classes of <i>Bacilli</i> ,<br><i>Gammaproteobacteria</i> , (order<br><i>Enterobacteriales</i> ), genera<br><i>Actinomyces</i> , <i>Streptococcus</i> in CA.<br>↓ richness in CA vs. HC; ↓↓ in AA<br>↓ <i>Erysipelotrichi</i> class in SSA vs. HP<br>and HC. | Gut microbes may play a role in the<br>early stages of CR carcinogenesis<br>through the development of CAs.                                                                                                                           |
| Peters et<br>al. (2016)<br>[51] | 7/9 | CA: 144 (proximal:<br>87; distal: 55;<br>NAA: 121; AA:<br>22),<br>SA: 73 (HP: 40;<br>SSA: 33) | HC: 323 | F (prior to bowel prep<br>or min. 5 days after<br>colonoscopy) | 16S       |                                                                                                                                                                                                                                                                                                                                                                                     |                                                                                                                                                                                                                                       |
| Hale et<br>al. (2017)<br>[35]   | 5/9 | A (> 1cm): 233                                                                                | HC: 547 | F<br>(prior to bowel prep)                                     | 16S       | ↑ <i>Bacteroidetes</i> phyla,<br><i>Deltaproteobacteria</i> class, OTUs in<br>the <i>Bilophila</i> , <i>Desulfovibrio</i> ,<br><i>Sutterella</i> , and <i>Mogibacterium</i><br>genera.                                                                                                                                                                                              | <i>Bilophila</i> and <i>Desulfovibrio</i> may<br>produce genotoxic or inflammatory<br>metabolites such as H <sub>2</sub> S and<br>secondary bile acids, which could<br>play a role in catalyzing A<br>development and eventually CRC. |
| Yang et<br>al. (2019)<br>[38]   | 6/9 | A: 117,<br>CRC: 62                                                                            | HC: 104 | F<br>(prior to bowel prep)                                     | 16S: V3-4 | ↑enterotypes: <i>Bacteroides</i> , <i>Prevotella</i> ,<br><i>Escherichia</i> .<br>↓ <i>Oscillospira</i> in AA → ↓↓<br><i>Oscillospira</i> in stage 0 CRC;                                                                                                                                                                                                                           | F microbiota differs along the A-<br>carcinoma sequence and across<br>enterotypes.<br>↓ CAG cluster 5 and cluster 7,<br>composed primarily of butyrate-                                                                               |

NOS: Newcastle-Ottawa scale; NA: not applicable; A: adenoma; AA: advanced adenoma (> 1 cm in diameter and/or high grade dysplasia (+/- villous, or tubulovillous morphology); NAA: non-advanced adenoma; TA or CA: conventional or traditional adenoma (≤ 1 cm diameter, without dysplasia (tubular, tubulovillous or villous)); HP: hyperplastic polyp; SSA: sessile serrated adenoma; TSA: traditional serrated adenoma; Cis: Ca in situ/intramucosal carcinoma/carcinoma in adenoma; CR: colorectal; CRA: colorectal adenoma; CRC: colorectal cancer; LST: laterally spreading tumor; HC: healthy controls; F: fecal samples; T: tissue (mucosal) samples; 16S: 16s rRNA gene sequencing; WGS: whole-genome shotgun sequencing; T-RFLP: terminal restriction fragment length polymorphism; NGS: next-generation sequencing; MGWAS: metagenome-wide association study; FISH: fluorescence in situ hybridization; LC-TOFMS: liquid chromatography time-of-flight mass spectrometry; GC-TOFMS: gas chromatography time-of-flight mass spectrometry; HPLC: high-performance liquid chromatography analysis; UPLC-MS: ultra performance liquid chromatography-mass spectrometry; ITS: Internal Transcribed Spacer (ITS) ribosomal RNA sequencing; FOBT: fecal occult blood test; CI: confidence interval; OR: odds ratio; AUC: area under the curve; OUTs: operational taxonomic units; *ETBF*: enterotoxigenic *Bacteroides fragilis*; SCFAs: short-chain fatty acids; FFFFT: fresh-frozen formalin fixed tissue; FFPE: formalin-fixed paraffin-embedded; prep: preparation; *Fn*: *Fusobacterium nucleatum*.



|                                |     |                   |        |                        |                                            |                                                                                                                                                                                                                                                                                |                                                                                                                                                             |
|--------------------------------|-----|-------------------|--------|------------------------|--------------------------------------------|--------------------------------------------------------------------------------------------------------------------------------------------------------------------------------------------------------------------------------------------------------------------------------|-------------------------------------------------------------------------------------------------------------------------------------------------------------|
|                                |     |                   |        |                        |                                            | ↓ <i>Haemophilus</i> in stage 0 CRC → ↓↓<br><i>Haemophilus</i> in early-stage CRC.<br>↑ <i>Fusobacterium</i> , <i>Enterococcus</i> ,<br><i>Aeromonas</i> ,<br>↓ <i>Eubacterium</i> , <i>Roseburia</i> ,<br><i>Faecalibacterium</i> , <i>Oscillospira</i> from<br>A → CRC.      | producing bacteria, is a suitable marker of CRC.                                                                                                            |
| Clos-Garcia et al. (2020) [32] | 7/9 | AA: 69; CRC: 99   | HC: 77 | F                      | 16S: V1–V2, targeted UPLC-MS metabolomics  | ↑ <i>Adlercreutzia</i> in AA.<br>↓ <i>Firmicutes</i> phylum and<br>↓ <i>Firmicutes: Bacteroidetes</i> ratio in<br>AA and CRC.<br>↓↓ <i>Fusobacteria</i> phylum in AA and<br>HC.<br>No significant differences in the<br>genera abundance of F<br>microbiome between AA and HC. | Integration of metabolomics and microbiome data revealed tight interactions between bacteria and host and performed better than FOB test for CRC diagnosis. |
| Wei et al. (2020) [33]         | 5/9 | A: 43; iFOBT+: 36 | HC: 53 | F                      | 16S: V3-4, short- and long-read sequencing | ↑ <i>Klebsiella pneumonia</i> ,<br><i>Fusobacterium varium</i> ,<br><i>Fusobacterium mortiferum</i> in A vs.<br>iFOBT+ and HC.                                                                                                                                                 | Identification of adenomatous polyp-associated microbiomes could potentially function as an auxiliary biomarker for predicting CRC development.             |
| Zhang, He et al.               | 5/9 | A: 29; CRC: 30    | HC: 35 | F (before colonoscopy) | shotgun metagenomics                       | <i>Clostridium Bolteae</i> , <i>Hungatella</i><br><i>Hatherwayi</i> , <i>Eggerthella lenta</i>                                                                                                                                                                                 | <i>Peptostreptococcus stomatis</i> ,<br><i>Clostridium symbiosum</i> , <i>Hungatella</i>                                                                    |

NOS: Newcastle-Ottawa scale; NA: not applicable; A: adenoma; AA: advanced adenoma (> 1 cm in diameter and/or high grade dysplasia (+/- villous, or tubulovillous morphology); NAA: non-advanced adenoma; TA or CA: conventional or traditional adenoma (≤ 1 cm diameter, without dysplasia (tubular, tubulovillous or villous)); HP: hyperplastic polyp; SSA: sessile serrated adenoma; TSA: traditional serrated adenoma; Cis: Ca in situ/intramucosal carcinoma/carcinoma in adenoma; CR: colorectal; CRA: colorectal adenoma; CRC: colorectal cancer; LST: laterally spreading tumor; HC: healthy controls; F: fecal samples; T: tissue (mucosal) samples; 16S: 16s rRNA gene sequencing; WGS: whole-genome shotgun sequencing; T-RFLP: terminal restriction fragment length polymorphism; NGS: next-generation sequencing; MGWAS: metagenome-wide association study; FISH: fluorescence in situ hybridization; LC-TOFMS: liquid chromatography time-of-flight mass spectrometry; GC-TOFMS: gas chromatography time-of-flight mass spectrometry; HPLC: high-performance liquid chromatography analysis; UPLC-MS: ultra performance liquid chromatography-mass spectrometry; ITS: Internal Transcribed Spacer (ITS) ribosomal RNA sequencing; FOBT: fecal occult blood test; CI: confidence interval; OR: odds ratio; AUC: area under the curve; OUTs: operational taxonomic units; *ETBF*: enterotoxigenic *Bacteroides fragilis*; SCFAs: short-chain fatty acids; FFFFT: fresh-frozen formalin fixed tissue; FFPE: formalin-fixed paraffin-embedded; prep: preparation; *Fn*: *Fusobacterium nucleatum*.

|                           |     |                 |         |                          |                 |                                                                                                                                                                                                                                                                                                                                                                                                                                                                                                        |                                                                                                                                                   |
|---------------------------|-----|-----------------|---------|--------------------------|-----------------|--------------------------------------------------------------------------------------------------------------------------------------------------------------------------------------------------------------------------------------------------------------------------------------------------------------------------------------------------------------------------------------------------------------------------------------------------------------------------------------------------------|---------------------------------------------------------------------------------------------------------------------------------------------------|
| (2022)<br>[39]            |     |                 |         |                          | c<br>sequencing | presented consistent changes in A and CRC vs. HC.<br>↑ <i>Blautia hansenii</i> , <i>Streptococcus sanguinis</i> , <i>Enterococcus faecalis</i> , and <i>Oxalobacter formigenes</i> in A.<br>Correlations of <i>Parvimonas micra</i> with <i>Peptostreptococcus stomatis</i> , <i>Eggerthella lenta</i> with <i>Lactobacillus mucosae</i> , <i>Hungatela hathawayi</i> with <i>Ruthenibacterium lactatiformans</i> in A and CRC.                                                                        | <i>hathewayi</i> , <i>Parvimonas micra</i> , and <i>Gemella Morbillorum</i> identified as a diagnostic model to identify CRC patients.            |
| Hua et al. (2022)<br>[40] | 5/9 | A: 20; CRC: 154 | HC: 199 | F (prior to colonoscopy) | 16S             | Genus level: ↑ <i>Acidaminococcus</i> , <i>Alloprevotella</i> , <i>Mycoplasma</i> , <i>Sphingobacterium</i> ; ↓ <i>Acidaminococcus</i> with the order of HC → A → CRC (P < 0.05).<br>↑ <i>Parvimonas</i> , <i>Peptostreptococcus</i> , <i>Prevotella</i> , <i>Butyricimonas</i> , <i>Alistipes</i> , <i>Odoribacter</i> in A and CRC.<br><i>Butyricimonas synergistica</i> , <i>Agrobacterium larrymoorei</i> , <i>Bacteroides plebeius</i> , <i>Lachnospiraceae bacterium feline oral taxon 001</i> , | Several intestinal bacteria changed along the A-carcinoma sequence and might be the potential markers for the diagnosis and treatment of CRA/CRC. |

NOS: Newcastle-Ottawa scale; NA: not applicable; A: adenoma; AA: advanced adenoma (> 1 cm in diameter and/or high grade dysplasia (+/- villous, or tubulovillous morphology); NAA: non-advanced adenoma; TA or CA: conventional or traditional adenoma (≤ 1 cm diameter, without dysplasia (tubular, tubulovillous or villous)); HP: hyperplastic polyp; SSA: sessile serrated adenoma; TSA: traditional serrated adenoma; Cis: Ca in situ/intramucosal carcinoma/carcinoma in adenoma; CR: colorectal; CRA: colorectal adenoma; CRC: colorectal cancer; LST: laterally spreading tumor; HC: healthy controls; F: fecal samples; T: tissue (mucosal) samples; 16S: 16S rRNA gene sequencing; WGS: whole-genome shotgun sequencing; T-RFLP: terminal restriction fragment length polymorphism; NGS: next-generation sequencing; MGWAS: metagenome-wide association study; FISH: fluorescence in situ hybridization; LC-TOFMS: liquid chromatography time-of-flight mass spectrometry; GC-TOFMS: gas chromatography time-of-flight mass spectrometry; HPLC: high-performance liquid chromatography analysis; UPLC-MS: ultra performance liquid chromatography-mass spectrometry; ITS: Internal Transcribed Spacer (ITS) ribosomal RNA sequencing; FOBT: fecal occult blood test; CI: confidence interval; OR: odds ratio; AUC: area under the curve; OUTs: operational taxonomic units; *ETBF*: enterotoxigenic *Bacteroides fragilis*; SCFAs: short-chain fatty acids; FFFFT: fresh-frozen formalin fixed tissue; FFPE: formalin-fixed paraffin-embedded; prep: preparation; *Fn*: *Fusobacterium nucleatum*.

|                              |     |                                                                            |         |                                                                               |               |                                                                                                                                                                                                                                                                           |                                                                                                                                                                                                                                                                                                                    |
|------------------------------|-----|----------------------------------------------------------------------------|---------|-------------------------------------------------------------------------------|---------------|---------------------------------------------------------------------------------------------------------------------------------------------------------------------------------------------------------------------------------------------------------------------------|--------------------------------------------------------------------------------------------------------------------------------------------------------------------------------------------------------------------------------------------------------------------------------------------------------------------|
|                              |     |                                                                            |         |                                                                               |               | <i>Clostridium scindens</i> , <i>Prevotella heparinolytica</i> , bacterium LD2013, <i>Streptococcus mutans</i> , <i>Lachnospiraceae</i> bacterium 19gly4, <i>Eubacterium hallii</i> - best performance in distinguishing A from CRC (AUC = 85.54%, 95% CI: 78.83-92.25%). |                                                                                                                                                                                                                                                                                                                    |
| Bosch et al. (2022) [34]     | 6/9 | A: 32 (19 strictly matched on age, BMI and smoking habits: AA: 9; NAA: 10) | HC: 32  | F (1 week prior to bowel prep for colonoscopy and 3 months after polypectomy) | 16S: V4; HPLC | <p>↑ <i>Butyricimonasspp.</i>, <i>Catenibacterium spp.</i>, <i>Faecalitalea spp.</i>;</p> <p>↓ <i>Anaerostipes spp.</i>, <i>Bifidobacterium spp.</i>, <i>Cyanobacteria</i> within the <i>Gastranaerophilales</i> order in A vs. HC.</p>                                   | F microbiome of post-endoscopy patients resemble those, of controls. A-specific panels of amino acids may improve the effectiveness of the surveillance program by detection of high-risk individuals for earlier surveillance endoscopy timing, leading to less unnecessary endoscopies and less interval cancer. |
| Zhang, Lu et al. (2022) [52] | 6/9 | AA: 268; NAA: 490                                                          | HC: 788 | F                                                                             | 16S           | <p>No significant differences in the <math>\alpha</math>-diversity among the 3 groups.</p> <p>↑ Genera: <i>Fusobacterium</i>, <i>Tyzzzerella 4</i>, <i>Phascolarctobacterium</i>, <i>Clostridium sensu stricto 1</i>; <i>Streptococcus</i>,</p>                           | Identified microbial signatures could complement FITs for detecting AA. Gut microbiota can act as a promising tool to optimize the current CRC screening modalities.                                                                                                                                               |

NOS: Newcastle-Ottawa scale; NA: not applicable; A: adenoma; AA: advanced adenoma (> 1 cm in diameter and/or high grade dysplasia (+/- villous, or tubulovillous morphology); NAA: non-advanced adenoma; TA or CA: conventional or traditional adenoma (≤ 1 cm diameter, without dysplasia (tubular, tubulovillous or villous)); HP: hyperplastic polyp; SSA: sessile serrated adenoma; TSA: traditional serrated adenoma; Cis: Ca in situ/intramucosal carcinoma/carcinoma in adenoma; CR: colorectal; CRA: colorectal adenoma; CRC: colorectal cancer; LST: laterally spreading tumor; HC: healthy controls; F: fecal samples; T: tissue (mucosal) samples; 16S: 16S rRNA gene sequencing; WGS: whole-genome shotgun sequencing; T-RFLP: terminal restriction fragment length polymorphism; NGS: next-generation sequencing; MGWAS: metagenome-wide association study; FISH: fluorescence in situ hybridization; LC-TOFMS: liquid chromatography time-of-flight mass spectrometry; GC-TOFMS: gas chromatography time-of-flight mass spectrometry; HPLC: high-performance liquid chromatography analysis; UPLC-MS: ultra performance liquid chromatography-mass spectrometry; ITS: Internal Transcribed Spacer (ITS) ribosomal RNA sequencing; FOBT: fecal occult blood test; CI: confidence interval; OR: odds ratio; AUC: area under the curve; OUTs: operational taxonomic units; *ETBF*: enterotoxigenic *Bacteroides fragilis*; SCFAs: short-chain fatty acids; FFFFT: fresh-frozen formalin fixed tissue; FFPE: formalin-fixed paraffin-embedded; prep: preparation; *Fn*: *Fusobacterium nucleatum*.

| Human studies examining TISSUE – derived gut bacterial composition in precancerous colorectal lesions (and/or CRC) |     |                                                                                   |                                                                                                                                                 |                                                          |                                              |                                                                                                                                                                                                                                                                                                                                                                                                 |                                                                                                                                                                                                                           |
|--------------------------------------------------------------------------------------------------------------------|-----|-----------------------------------------------------------------------------------|-------------------------------------------------------------------------------------------------------------------------------------------------|----------------------------------------------------------|----------------------------------------------|-------------------------------------------------------------------------------------------------------------------------------------------------------------------------------------------------------------------------------------------------------------------------------------------------------------------------------------------------------------------------------------------------|---------------------------------------------------------------------------------------------------------------------------------------------------------------------------------------------------------------------------|
| <p style="text-align: right;"><i>Gemella, Actinomyces, Terrisporobacter</i> in AA vs. HC</p>                       |     |                                                                                   |                                                                                                                                                 |                                                          |                                              |                                                                                                                                                                                                                                                                                                                                                                                                 |                                                                                                                                                                                                                           |
| Sanapareddy et al. (2012) [41]                                                                                     | 5/9 | A: 33                                                                             | A-free controls: 38                                                                                                                             | T (from normal rectal mucosa – 10-12 cm from anal verge) | 16S, 454 pyrosequencing                      | <p>↑ numbers of bacteria from 87 taxa in A comparing to A-free controls.</p> <p>↑ <i>TM7, Cyanobacteria, Verrucomicrobia, Acidovorax, Aquabacterium, Cloacibacterium, Helicobacter, Lactococcus, Lactobacillus, Pseudomonas</i> and other (phylum <i>Proteobacteria</i>)</p>                                                                                                                    | Sequence analysis of the microbiota could be used to identify patients at risk for developing A.                                                                                                                          |
| Dejea et al. (2014) [42]                                                                                           | 5/9 | USA and Malaysian cohorts: Right-sided: A: 6; CRC: 15; Left-sided: A: 2; CRC: 15. | HC: 22 (11 right and left-matched pairs, none biofilm positive, USA cohort); paired normal adjacent tissue (at the time of surgery/colonoscopy) | T (FFFT from tumor)                                      | 16S: V3–V5, high-throughput sequencing, FISH | <p>Patients with biofilm-positive tumors (A or CRC), all had biofilms on their tumor-free mucosa far distant from their tumors.</p> <p>↑ <i>Bacteroidetes</i> and <i>Firmicutes</i> (family <i>Lachnospiraceae</i> including <i>Clostridium, Ruminococcus</i>, and <i>Butyrivibrio</i>) in A and CRC.</p> <p>↑ <i>Fusobacteria, Gammaproteobacteria (Enterobacteriaceae family)</i> in CRC.</p> | <p>Biofilm presence correlates with bacterial tissue invasion and changes in tissue biology with ↑ cellular proliferation.</p> <p>Colon mucosal biofilm detection may predict ↑ risk for development of sporadic CRC.</p> |

NOS: Newcastle-Ottawa scale; NA: not applicable; A: adenoma; AA: advanced adenoma (> 1 cm in diameter and/or high grade dysplasia (+/- villous, or tubulovillous morphology); NAA: non-advanced adenoma; TA or CA: conventional or traditional adenoma (≤ 1 cm diameter, without dysplasia (tubular, tubulovillous or villous)); HP: hyperplastic polyp; SSA: sessile serrated adenoma; TSA: traditional serrated adenoma; Cis: Ca in situ/intramucosal carcinoma/carcinoma in adenoma; CR: colorectal; CRA: colorectal adenoma; CRC: colorectal cancer; LST: laterally spreading tumor; HC: healthy controls; F: fecal samples; T: tissue (mucosal) samples; 16S: 16S rRNA gene sequencing; WGS: whole-genome shotgun sequencing; T-RFLP: terminal restriction fragment length polymorphism; NGS: next-generation sequencing; MGWAS: metagenome-wide association study; FISH: fluorescence in situ hybridization; LC-TOFMS: liquid chromatography time-of-flight mass spectrometry; GC-TOFMS: gas chromatography time-of-flight mass spectrometry; HPLC: high-performance liquid chromatography analysis; UPLC-MS: ultra performance liquid chromatography-mass spectrometry; ITS: Internal Transcribed Spacer (ITS) ribosomal RNA sequencing; FOBT: fecal occult blood test; CI: confidence interval; OR: odds ratio; AUC: area under the curve; OUTs: operational taxonomic units; *ETBF*: enterotoxigenic *Bacteroides fragilis*; SCFAs: short-chain fatty acids; FFFFT: fresh-frozen formalin fixed tissue; FFPE: formalin-fixed paraffin-embedded; prep: preparation; *Fn*: *Fusobacterium nucleatum*.

|                           |     |              |                           |                                                              |                          |                                                                                                                                                                                                                                                                                                                                                                                                                             |                                                                                                                                   |
|---------------------------|-----|--------------|---------------------------|--------------------------------------------------------------|--------------------------|-----------------------------------------------------------------------------------------------------------------------------------------------------------------------------------------------------------------------------------------------------------------------------------------------------------------------------------------------------------------------------------------------------------------------------|-----------------------------------------------------------------------------------------------------------------------------------|
|                           |     |              |                           |                                                              |                          | Biofilms identified on surgically resected, normal tissues were also consistently diverse, composed of <i>Bacteroidetes</i> , <i>Lachnospiraceae</i> , <i>Gammaproteobacteria</i> .                                                                                                                                                                                                                                         |                                                                                                                                   |
| Geng et al. (2014) [43]   | 6/9 | A:10; CRC: 8 | HC: 10 (location-matched) | T (from tumor)                                               | 16S, 454 pyrosequencing  | ↑ <i>Enterobacteriaceae</i> , <i>Enterobacter</i> , <i>Pseudomonadaceae</i> , <i>Neisseriaceae</i> , <i>Chryseobacterium</i> , NKB19, <i>Planomicrobium</i> (potential driver bacteria);<br>↓ <i>Anoxybacillus</i> , <i>Megamonas</i> , <i>Streptophyta</i> , <i>Microbacterium</i> , <i>Methylobacterium</i> , TM7-3, <i>Staphylococcus</i> , etc. – (potential anti-inflammatory passenger bacteria) in A vs. HC and CRC. | Bacterial driver-passenger model for CRC.                                                                                         |
| Nugent et al. (2014) [36] | 6/9 | A: 15        | A-free controls: 15       | T (from normal rectal mucosa – 10–12 cm from the anal verge) | qPCR; LC-TOFMS, GC-TOFMS | ↑ <i>Bifidobacterium</i> and <i>Eubacteria</i> ;<br>↑ <i>Escherichia coli</i> , <i>Clostridium sp.</i> , <i>Bacteroides sp</i> (without statistical significance) in A vs. A-free controls.                                                                                                                                                                                                                                 | Metabolic products of bacteria and the interplay between bacteria and metabolites is important in the development of CRA and CRC. |

NOS: Newcastle-Ottawa scale; NA: not applicable; A: adenoma; AA: advanced adenoma (> 1 cm in diameter and/or high grade dysplasia (+/- villous, or tubulovillous morphology); NAA: non-advanced adenoma; TA or CA: conventional or traditional adenoma (≤ 1 cm diameter, without dysplasia (tubular, tubulovillous or villous)); HP: hyperplastic polyp; SSA: sessile serrated adenoma; TSA: traditional serrated adenoma; Cis: Ca in situ/intramucosal carcinoma/carcinoma in adenoma; CR: colorectal; CRA: colorectal adenoma; CRC: colorectal cancer; LST: laterally spreading tumor; HC: healthy controls; F: fecal samples; T: tissue (mucosal) samples; 16S: 16S rRNA gene sequencing; WGS: whole-genome shotgun sequencing; T-RFLP: terminal restriction fragment length polymorphism; NGS: next-generation sequencing; MGWAS: metagenome-wide association study; FISH: fluorescence in situ hybridization; LC-TOFMS: liquid chromatography time-of-flight mass spectrometry; GC-TOFMS: gas chromatography time-of-flight mass spectrometry; HPLC: high-performance liquid chromatography analysis; UPLC-MS: ultra performance liquid chromatography-mass spectrometry; ITS: Internal Transcribed Spacer (ITS) ribosomal RNA sequencing; FOBT: fecal occult blood test; CI: confidence interval; OR: odds ratio; AUC: area under the curve; OUTs: operational taxonomic units; *ETBF*: enterotoxigenic *Bacteroides fragilis*; SCFAs: short-chain fatty acids; FFFFT: fresh-frozen formalin fixed tissue; FFPE: formalin-fixed paraffin-embedded; prep: preparation; *Fn*: *Fusobacterium nucleatum*.

|                             |     |                                                                                                                                                                                                                         |                                                 |                  |                                |                                                                                                                                                                                                                                                                                                                                                                                                                                                             |                                                                                                                                                                                                                              |
|-----------------------------|-----|-------------------------------------------------------------------------------------------------------------------------------------------------------------------------------------------------------------------------|-------------------------------------------------|------------------|--------------------------------|-------------------------------------------------------------------------------------------------------------------------------------------------------------------------------------------------------------------------------------------------------------------------------------------------------------------------------------------------------------------------------------------------------------------------------------------------------------|------------------------------------------------------------------------------------------------------------------------------------------------------------------------------------------------------------------------------|
| Lu et al.<br>(2016)<br>[44] | 7/9 | A: 31                                                                                                                                                                                                                   | HC: 20; paired<br>normal adjacent<br>tissue     | T (from adenoma) | 16S<br>pyrosequencing          | Abundance of 8 phyla ( <i>Firmicutes</i> ,<br><i>Proteobacteria</i> , <i>Bacteroidetes</i> ,<br><i>Actinobacteria</i> , <i>Chloroflexi</i> ,<br><i>Cyanobacteria</i> , <i>Candidatus-division</i><br><i>TM7</i> , and <i>Tenericutes</i> ) was<br>significantly different in A and<br>HC.<br>↑ <i>Lactococcus</i> , <i>Pseudomonas</i> ; ↓<br><i>Enterococcus</i> , <i>Bacillus</i> , <i>Solibacillus</i> in<br>A.<br>Genera: ↑ <i>Proteobacteria</i> in A. | Suggesting CR preneoplastic lesion<br>may be the most important factor<br>leading to alterations in bacterial<br>community composition.                                                                                      |
| Yu et al.<br>(2016)<br>[54] | 6/9 | Proximal HP: 35,<br>SSA: 33;<br>Distal HP: 40;<br>Proximal TA: 38;<br>Distal TA: 41;<br>Distal CRC: 45 (+<br>10 metastatic, 10<br>nonmetastatic<br>matched lymph<br>nodes);<br>Proximal CRC: 48<br>(+ 10 metastatic, 10 | HC: 20 (10<br>proximal, 10 distal<br>CR mucosa) | T (from tumor)   | 16S,<br>FISH,<br><i>Fn</i> PCR | ↑ <i>Fusobacterium</i> in proximal HPs<br>and SSAs vs. proximal TAs and<br>distal TAs ( $p < 0.05$ ).                                                                                                                                                                                                                                                                                                                                                       | Invasive <i>Fn</i> is involved primarily in<br>the carcinogenesis of proximal colon<br>cancers that develop along the<br>serrated neoplasia pathway, having<br>only a minor role in the traditional<br>A-carcinoma sequence. |

NOS: Newcastle-Ottawa scale; NA: not applicable; A: adenoma; AA: advanced adenoma (> 1 cm in diameter and/or high grade dysplasia (+/- villous, or tubulovillous morphology); NAA: non-advanced adenoma; TA or CA: conventional or traditional adenoma ( $\leq$  1 cm diameter, without dysplasia (tubular, tubulovillous or villous)); HP: hyperplastic polyp; SSA: sessile serrated adenoma; TSA: traditional serrated adenoma; Cis: Ca in situ/intramucosal carcinoma/carcinoma in adenoma; CR: colorectal; CRA: colorectal adenoma; CRC: colorectal cancer; LST: laterally spreading tumor; HC: healthy controls; F: fecal samples; T: tissue (mucosal) samples; 16S: 16s rRNA gene sequencing; WGS: whole-genome shotgun sequencing; T-RFLP: terminal restriction fragment length polymorphism; NGS: next-generation sequencing; MGWAS: metagenome-wide association study; FISH: fluorescence in situ hybridization; LC-TOFMS: liquid chromatography time-of-flight mass spectrometry; GC-TOFMS: gas chromatography time-of-flight mass spectrometry; HPLC: high-performance liquid chromatography analysis; UPLC-MS: ultra performance liquid chromatography-mass spectrometry; ITS: Internal Transcribed Spacer (ITS) ribosomal RNA sequencing; FOBT: fecal occult blood test; CI: confidence interval; OR: odds ratio; AUC: area under the curve; OUTs: operational taxonomic units; *ETBF*: enterotoxigenic *Bacteroides fragilis*; SCFAs: short-chain fatty acids; FFFFT: fresh-frozen formalin fixed tissue; FFPE: formalin-fixed paraffin-embedded; prep: preparation; *Fn*: *Fusobacterium nucleatum*.

| nonmetastatic matched lymph nodes). |     |                |                                   |                             |                                                |                                                                                                                                                                                                                                                                                                                                                                                                                                                                                                                         |
|-------------------------------------|-----|----------------|-----------------------------------|-----------------------------|------------------------------------------------|-------------------------------------------------------------------------------------------------------------------------------------------------------------------------------------------------------------------------------------------------------------------------------------------------------------------------------------------------------------------------------------------------------------------------------------------------------------------------------------------------------------------------|
| Xu et al. (2017) [45]               | 6/9 | A: 47; CRC: 52 | HC: 61                            | T (from tumor)              | 16S                                            | <p>↑ <i>Acidomonas</i>, <i>Escherichia</i>, <i>Pseudomonas</i>, <i>Sphingomonas</i> in A and HC vs. CRC.</p> <p>Chao1 Richness Index of the mucosal microbiota was significantly different in HC, A, and CRC.</p> <p>Shannon Index and Simpson Index in the 3 groups were not significantly different.</p> <p>No significant difference for any phylum in A vs. HC.</p> <p><i>Butyricicoccus</i>, <i>E. coli</i>, <i>Fusobacterium</i> can be used as potential biomarkers for HC, A, and CRC groups, respectively.</p> |
| Wachsmann et al. (2018) [46]        | 5/9 | A: 10; CRC: 10 | HC: 9; paired nonmalignant tissue | T (4-6 biopsies from tumor) | ENTEROTest 24 plus MALDI-TOF mass spectrometry | <p>↑ intracellular <i>E. coli</i> in ↑↑A &lt; ↑↑↑CRC vs. HC.</p> <p><i>Escherichia coli</i>, <i>Proteus mirabilis</i>, <i>Proteus vulgaris</i> in A and CRC.</p> <p>A: ↑ <i>Pseudomonas aeruginosa</i>, <i>Bacillus cereus</i>, <i>Klebsiella pneumoniae</i>, <i>Enterococcus faecalis</i>.</p> <p>Data supports <i>E. coli</i>'s role as a pro-oncogenic pathogen.</p>                                                                                                                                                 |

NOS: Newcastle-Ottawa scale; NA: not applicable; A: adenoma; AA: advanced adenoma (> 1 cm in diameter and/or high grade dysplasia (+/- villous, or tubulovillous morphology); NAA: non-advanced adenoma; TA or CA: conventional or traditional adenoma (≤ 1 cm diameter, without dysplasia (tubular, tubulovillous or villous)); HP: hyperplastic polyp; SSA: sessile serrated adenoma; TSA: traditional serrated adenoma; Cis: Ca in situ/intramucosal carcinoma/carcinoma in adenoma; CR: colorectal; CRA: colorectal adenoma; CRC: colorectal cancer; LST: laterally spreading tumor; HC: healthy controls; F: fecal samples; T: tissue (mucosal) samples; 16S: 16S rRNA gene sequencing; WGS: whole-genome shotgun sequencing; T-RFLP: terminal restriction fragment length polymorphism; NGS: next-generation sequencing; MGWAS: metagenome-wide association study; FISH: fluorescence in situ hybridization; LC-TOFMS: liquid chromatography time-of-flight mass spectrometry; GC-TOFMS: gas chromatography time-of-flight mass spectrometry; HPLC: high-performance liquid chromatography analysis; UPLC-MS: ultra performance liquid chromatography-mass spectrometry; ITS: Internal Transcribed Spacer (ITS) ribosomal RNA sequencing; FOBT: fecal occult blood test; CI: confidence interval; OR: odds ratio; AUC: area under the curve; OUTs: operational taxonomic units; *ETBF*: enterotoxigenic *Bacteroides fragilis*; SCFAs: short-chain fatty acids; FFFFT: fresh-frozen formalin fixed tissue; FFPE: formalin-fixed paraffin-embedded; prep: preparation; *Fn*: *Fusobacterium nucleatum*.

|                                                   |     |                                                 |                                                                                                                        |                     |                                                                        |                                                                                                                                                                                                                                                                                                                                                                         |                                                                                                                                                                                                                                                                                                                    |
|---------------------------------------------------|-----|-------------------------------------------------|------------------------------------------------------------------------------------------------------------------------|---------------------|------------------------------------------------------------------------|-------------------------------------------------------------------------------------------------------------------------------------------------------------------------------------------------------------------------------------------------------------------------------------------------------------------------------------------------------------------------|--------------------------------------------------------------------------------------------------------------------------------------------------------------------------------------------------------------------------------------------------------------------------------------------------------------------|
|                                                   |     |                                                 |                                                                                                                        |                     | Gentamicin-<br>protection<br>assay                                     | <i>Proteus mirabilis</i> inside = outside<br>the epithelial cells.                                                                                                                                                                                                                                                                                                      |                                                                                                                                                                                                                                                                                                                    |
| Bundgaard-<br>Nielsen<br>et al.<br>(2019)<br>[47] | 7/9 | A: 96; CRC: 99;<br>diverticular<br>disease: 104 | Paired normal<br>tissue from CRC<br>group: 76;<br>No HC, no paired<br>normal tissue<br>from A or<br>diverticula groups | T (FFPE from tumor) | 16S,<br>S.<br><i>gallolyticus</i> ,<br><i>Fn</i> , <i>ETBF</i><br>qPCR | <i>S. gallolyticus</i> was not detected;<br>↓ <i>Fn</i> and <i>ETBF</i> in A vs. CRC and<br>diverticula.<br><i>Acinetobacter</i> genus associated with<br>A and diverticula.<br>Bacterial composition of CRC<br>tissue overlaps with that of paired<br>normal tissue, but differs from A<br>and diverticula.                                                            | Findings do not support a role of <i>Fn</i><br>or <i>ETBF</i> during CR beginning, while<br><i>S. gallolyticus</i> was not implicated in<br>the CR tissue of a Danish<br>population.<br>A potential role of the bacterial<br>genera <i>Prevotella</i> and <i>Acinetobacter</i><br>requires further investigations. |
| Wang et<br>al. (2020)<br>[53]                     | 5/9 | AA: 49                                          | HC: 36;<br>normal adjacent<br>tissue                                                                                   | T (from polyp)      | 16S: V4,<br>high-<br>throughput<br>sequencing                          | ↑ <i>Proteobacteria</i> , ↓ <i>Firmicutes</i> ,<br><i>Bacteroidetes</i> ;<br>↑ <i>Halomonadaceae</i> , <i>Shewanella algae</i> ,<br><i>Lachnospiraceae</i> ;<br>↓ <i>Faecalibacterium prausnitzii</i> of<br><i>Clostridiales</i> , <i>Blautia</i> , <i>Coprococcus</i> of<br><i>Lachnospiraceae</i> , <i>Bacteroidetes</i> of<br><i>Bacteroides ovatus</i> in A vs. HC. | ↑ <i>Halomonadaceae</i> and <i>Shewanella<br/>algae</i> and ↓ <i>Coprococcus</i> and<br><i>Bacteroides ovatus</i> could serve as a<br>biomarker of CRA.                                                                                                                                                            |

NOS: Newcastle-Ottawa scale; NA: not applicable; A: adenoma; AA: advanced adenoma (> 1 cm in diameter and/or high grade dysplasia (+/- villous, or tubulovillous morphology); NAA: non-advanced adenoma; TA or CA: conventional or traditional adenoma (≤ 1 cm diameter, without dysplasia (tubular, tubulovillous or villous)); HP: hyperplastic polyp; SSA: sessile serrated adenoma; TSA: traditional serrated adenoma; Cis: Ca in situ/intramucosal carcinoma/carcinoma in adenoma; CR: colorectal; CRA: colorectal adenoma; CRC: colorectal cancer; LST: laterally spreading tumor; HC: healthy controls; F: fecal samples; T: tissue (mucosal) samples; 16S: 16s rRNA gene sequencing; WGS: whole-genome shotgun sequencing; T-RFLP: terminal restriction fragment length polymorphism; NGS: next-generation sequencing; MGWAS: metagenome-wide association study; FISH: fluorescence in situ hybridization; LC-TOFMS: liquid chromatography time-of-flight mass spectrometry; GC-TOFMS: gas chromatography time-of-flight mass spectrometry; HPLC: high-performance liquid chromatography analysis; UPLC-MS: ultra performance liquid chromatography-mass spectrometry; ITS: Internal Transcribed Spacer (ITS) ribosomal RNA sequencing; FOBT: fecal occult blood test; CI: confidence interval; OR: odds ratio; AUC: area under the curve; OUTs: operational taxonomic units; *ETBF*: enterotoxigenic *Bacteroides fragilis*; SCFAs: short-chain fatty acids; FFFFT: fresh-frozen formalin fixed tissue; FFPE: formalin-fixed paraffin-embedded; prep: preparation; *Fn*: *Fusobacterium nucleatum*.



|                              |     |                                                                                                                                                 |                                                           |                                     |         |                                                                                                                                                                                                                                                                                                                                                                                                                                                                          |                                                                                                                                                                                                                            |
|------------------------------|-----|-------------------------------------------------------------------------------------------------------------------------------------------------|-----------------------------------------------------------|-------------------------------------|---------|--------------------------------------------------------------------------------------------------------------------------------------------------------------------------------------------------------------------------------------------------------------------------------------------------------------------------------------------------------------------------------------------------------------------------------------------------------------------------|----------------------------------------------------------------------------------------------------------------------------------------------------------------------------------------------------------------------------|
| Liu et al.<br>(2021)<br>[48] | 5/9 | Cohort 1:<br>Zhongshan<br>Hospital: A: 10,<br>CRC: 11;<br><br>Cohort 2: Fourth<br>Affiliated<br>Hospital: A: 10;<br>CRC: 10;<br>+A: 12; CRC: 15 | Paired normal<br>adjacent tissue (2<br>biopsies)<br>No HC | T (4-6 biopsies from<br>tumor)<br>A | 16S: V4 | ↑ <i>Fusobacterium</i> , <i>Bacteroides</i> ,<br><i>Parvimonas</i> , and <i>Prevotella</i> in A →<br>↑↑ in CRC.<br>A: <i>Proteobacteria</i> >> <i>Firmicutes</i> →<br>CRC: <i>Firmicutes</i> >> <i>Proteobacteria</i> .<br>A and CRC had neoplasia biopsies<br>with significantly different<br>microbiota composition.<br>A and CRC: microbial diversity ( $\alpha$ -<br>and $\beta$ -diversity) between neoplasia<br>and adjacent normal tissue was not<br>significant. | Intra-neoplasia microbiota is<br>heterogeneous and correlates with<br>CR carcinogenesis.<br>Association of intratumoral<br>microbial heterogeneity and CRC-<br>associated genetic alterations of<br>KRAS mutation and MSI. |
|------------------------------|-----|-------------------------------------------------------------------------------------------------------------------------------------------------|-----------------------------------------------------------|-------------------------------------|---------|--------------------------------------------------------------------------------------------------------------------------------------------------------------------------------------------------------------------------------------------------------------------------------------------------------------------------------------------------------------------------------------------------------------------------------------------------------------------------|----------------------------------------------------------------------------------------------------------------------------------------------------------------------------------------------------------------------------|

NOS: Newcastle-Ottawa scale; NA: not applicable; A: adenoma; AA: advanced adenoma (> 1 cm in diameter and/or high grade dysplasia (+/- villous, or tubulovillous morphology); NAA: non-advanced adenoma; TA or CA: conventional or traditional adenoma ( $\leq$  1 cm diameter, without dysplasia (tubular, tubulovillous or villous)); HP: hyperplastic polyp; SSA: sessile serrated adenoma; TSA: traditional serrated adenoma; Cis: Ca in situ/intramucosal carcinoma/carcinoma in adenoma; CR: colorectal; CRA: colorectal adenoma; CRC: colorectal cancer; LST: laterally spreading tumor; HC: healthy controls; F: fecal samples; T: tissue (mucosal) samples; 16S: 16s rRNA gene sequencing; WGS: whole-genome shotgun sequencing; T-RFLP: terminal restriction fragment length polymorphism; NGS: next-generation sequencing; MGWAS: metagenome-wide association study; FISH: fluorescence in situ hybridization; LC-TOFMS: liquid chromatography time-of-flight mass spectrometry; GC-TOFMS: gas chromatography time-of-flight mass spectrometry; HPLC: high-performance liquid chromatography analysis; UPLC-MS: ultra performance liquid chromatography-mass spectrometry; ITS: Internal Transcribed Spacer (ITS) ribosomal RNA sequencing; FOBT: fecal occult blood test; CI: confidence interval; OR: odds ratio; AUC: area under the curve; OUTs: operational taxonomic units; *ETBF*: enterotoxigenic *Bacteroides fragilis*; SCFAs: short-chain fatty acids; FFFFT: fresh-frozen formalin fixed tissue; FFPE: formalin-fixed paraffin-embedded; prep: preparation; *Fn*: *Fusobacterium nucleatum*.
