# Supplementary material for: Tissue vs. Fecal-Derived Bacterial Dysbiosis in Precancerous Colorectal Lesions: A Systematic Review
Source: MDPI journal article supplement (doi:10.3390/cancers15051602), 2023-03-04
Supplement: s1 [file s1]

**Supplementary Table 2.** Quality assessment of tissue + stool or stool or tissue-based case-control, cross sectional and cohort studies using Newcastle-Ottawa scale. A study can be awarded a maximum of one star for each numbered item within the Selection and Exposure categories. A maximum of two stars can be given for Comparability.

|                                     | Case Definition<br>(Histologically confirmed) | Representativeness<br>of cases (n=100+) | Selection<br>of controls<br>(from same<br>area) | Definition of<br>controls<br>(Histological<br>confirmation) | Comparability<br>(Matched<br>controls or same<br>tissue area) | Exposure<br>measurement<br>(used internal<br>control ) | Same<br>method for<br>cases and<br>controls | Non-response rate<br>(Described or used<br>consecutive<br>recruitment) | Total<br>score |
|-------------------------------------|-----------------------------------------------|-----------------------------------------|-------------------------------------------------|-------------------------------------------------------------|---------------------------------------------------------------|--------------------------------------------------------|---------------------------------------------|------------------------------------------------------------------------|----------------|
| <b>Tissue + Stool</b>               |                                               |                                         |                                                 |                                                             |                                                               |                                                        |                                             |                                                                        |                |
| Zeller et al. (2014) [30]           | 1                                             | 1                                       | 0                                               | 0                                                           | 1                                                             | 1                                                      | 1                                           | 0                                                                      | 5              |
| Mira-Pascual et al. (2015) [23]     | 1                                             | 0                                       | 1                                               | 1                                                           | 2                                                             | 1                                                      | 1                                           | 0                                                                      | 7              |
| Yu et al. (2015) [25]               | 1                                             | 1                                       | 1                                               | 0                                                           | 0                                                             | 1                                                      | 1                                           | 0                                                                      | 5              |
| Flemer et al. (2017) [24]           | 1                                             | 0                                       | 1                                               | 1                                                           | 2                                                             | 0                                                      | 1                                           | 0                                                                      | 6              |
| Shen et al. (2021) [26]             | 1                                             | 1                                       | 1                                               | 1                                                           | 0                                                             | 1                                                      | 1                                           | 1                                                                      | 7              |
| Watson et al. (2021) [27]           | 1                                             | 0                                       | 1                                               | 1                                                           | 0                                                             | 1                                                      | 1                                           | 0                                                                      | 5              |
| Avelar-Barragan et al. (2022) [31]  | 1                                             | 0                                       | 1                                               | 0                                                           | 0                                                             | 1                                                      | 1                                           | 1                                                                      | 5              |
| <b>Stool</b>                        |                                               |                                         |                                                 |                                                             |                                                               |                                                        |                                             |                                                                        |                |
| Brim et al. (2013) [18]             | 1                                             | 0                                       | 1                                               | 1                                                           | 0                                                             | 1                                                      | 1                                           | 0                                                                      | 5              |
| Chen et al. (2013) [49]             | 1                                             | 0                                       | 1                                               | 1                                                           | 2                                                             | 0                                                      | 0                                           | 0                                                                      | 5              |
| Feng et al. (2015) [50]             | 1                                             | 0                                       | 1                                               | 1                                                           | 2                                                             | 1                                                      | 1                                           | 0                                                                      | 7              |
| Goedert et al. (2015) [37]          | 1                                             | 0                                       | 1                                               | 0                                                           | 0                                                             | 1                                                      | 1                                           | 1                                                                      | 5              |
| Kasai et al. (2016) [55]            | 1                                             | 0                                       | 1                                               | 0                                                           | 0                                                             | 1                                                      | 1                                           | 1                                                                      | 5              |
| Peters et al. (2016) [51]           | 1                                             | 1                                       | 1                                               | 1                                                           | 0                                                             | 1                                                      | 1                                           | 1                                                                      | 7              |
| Hale et al. (2017) [35]             | 1                                             | 1                                       | 1                                               | 0                                                           | 0                                                             | 1                                                      | 1                                           | 0                                                                      | 5              |
| Yang et al. (2019) [38]             | 1                                             | 1                                       | 1                                               | 1                                                           | 0                                                             | 1                                                      | 1                                           | 0                                                                      | 6              |
| Clos-Garcia et al. (2020) [32]      | 1                                             | 1                                       | 1                                               | 1                                                           | 0                                                             | 1                                                      | 1                                           | 1                                                                      | 7              |
| Wei et al. (2020) [33]              | 1                                             | 0                                       | 1                                               | 0                                                           | 0                                                             | 1                                                      | 1                                           | 1                                                                      | 5              |
| Zhang, He et al. (2022) [39]        | 1                                             | 0                                       | 1                                               | 0                                                           | 0                                                             | 1                                                      | 1                                           | 1                                                                      | 5              |
| Hua et al. (2022) [40]              | 1                                             | 1                                       | 1                                               | 0                                                           | 0                                                             | 1                                                      | 1                                           | 0                                                                      | 5              |
| Bosch et al. (2022) [34]            | 1                                             | 0                                       | 1                                               | 0                                                           | 2                                                             | 1                                                      | 1                                           | 0                                                                      | 6              |
| Zhang, Lu et al. (2022) [52]        | 1                                             | 1                                       | 1                                               | 0                                                           | 0                                                             | 1                                                      | 1                                           | 1                                                                      | 6              |
| <b>Tissue</b>                       |                                               |                                         |                                                 |                                                             |                                                               |                                                        |                                             |                                                                        |                |
| Sanapareddy et al. (2012) [41]      | 1                                             | 0                                       | 1                                               | 1                                                           | 0                                                             | 1                                                      | 1                                           | 0                                                                      | 5              |
| Dejea et al. (2014) [42]            | 1                                             | 0                                       | 0                                               | 1                                                           | 1                                                             | 1                                                      | 1                                           | 0                                                                      | 5              |
| Geng et al. (2014) [43]             | 1                                             | 0                                       | 1                                               | 1                                                           | 1                                                             | 1                                                      | 1                                           | 0                                                                      | 6              |
| Nugent et al. (2014) [36]           | 1                                             | 0                                       | 1                                               | 1                                                           | 1                                                             | 1                                                      | 1                                           | 0                                                                      | 6              |
| Lu et al. (2016) [44]               | 1                                             | 0                                       | 1                                               | 1                                                           | 2                                                             | 1                                                      | 1                                           | 0                                                                      | 7              |
| Yu et al. (2016) [54]               | 1                                             | 1                                       | 1                                               | 0                                                           | 1                                                             | 1                                                      | 1                                           | 0                                                                      | 6              |
| Xu et al. (2017) [45]               | 1                                             | 1                                       | 1                                               | 1                                                           | 0                                                             | 1                                                      | 1                                           | 0                                                                      | 6              |
| Wachsmannova et al. (2018) [46]     | 1                                             | 0                                       | 1                                               | 1                                                           | 0                                                             | 1                                                      | 1                                           | 0                                                                      | 5              |
| Bundgaard-Nielsen et al.(2019) [47] | 1                                             | 1                                       | 1                                               | 1                                                           | 0                                                             | 1                                                      | 1                                           | 1                                                                      | 7              |
| Wang et al. (2020) [53]             | 1                                             | 0                                       | 1                                               | 1                                                           | 0                                                             | 1                                                      | 1                                           | 0                                                                      | 5              |
| Liu et al. (2021) [48]              | 1                                             | 0                                       | 1                                               | 1                                                           | 0                                                             | 1                                                      | 1                                           | 0                                                                      | 5              |
